# Supplementary material
Source: PubMed Central journal article supplement (PMC4507343)
Supplement: JB.00332-15_zjb999093696so1.pdf [file JB.00332-15_zjb999093696so1.pdf]

1 **Homologues of genetic transformation DNA import genes are required for *Rhodobacter***  
2 ***capsulatus* gene transfer agent recipient capability regulated by the CtrA response**  
3 **regulator**

4 Cedric A. Brimacombe<sup>1</sup>, Hao Ding<sup>1</sup>, Jeanette A. Johnson<sup>1</sup>, and J. Thomas Beatty<sup>1</sup>

5

6 **Supplemental Material**

7

8

9

10

11

12

13

14

15

16

17

18

19

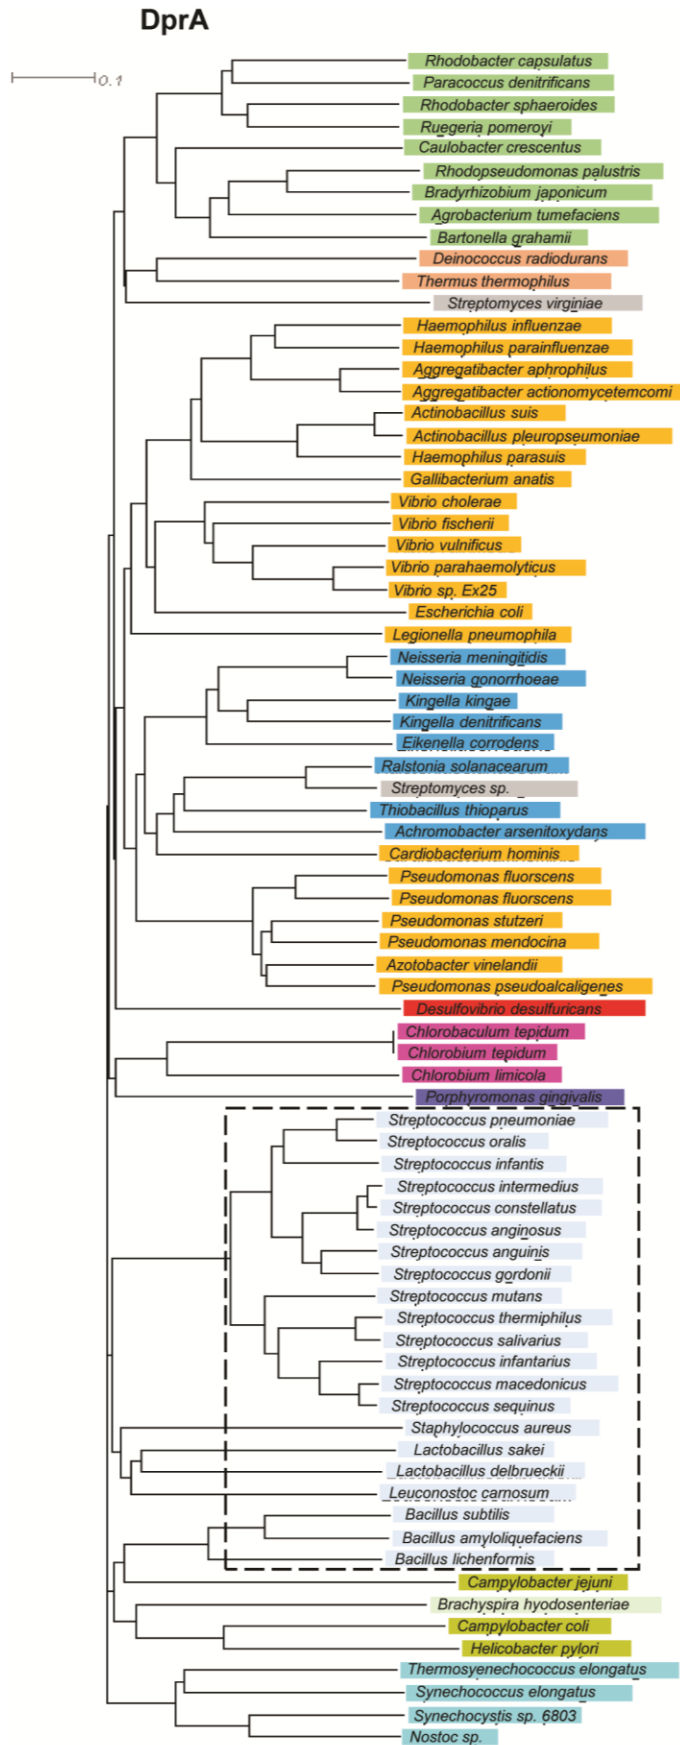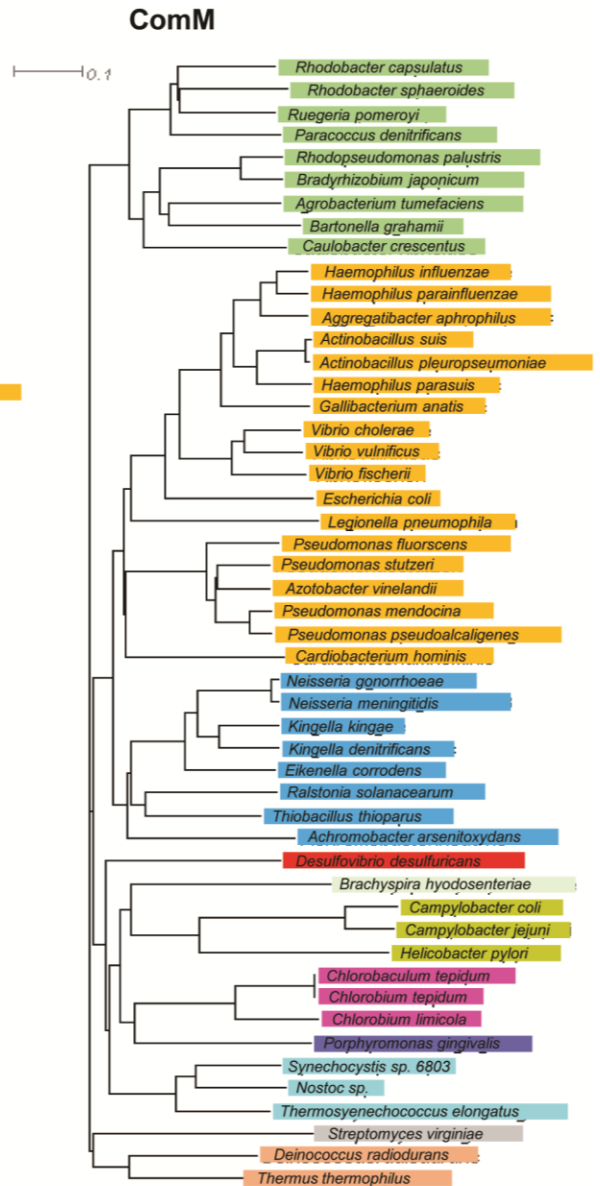

### Legend

- α-proteobacteria
- γ-proteobacteria
- β-proteobacteria
- ε-proteobacteria
- δ-proteobacteria
- chlorobiaceae
- firmicutes
- cyanobacteria
- bacteroidetes
- spirochaetes
- actinomycetes
- thermaceae

21 **Figure S1.** Neighbour joining phylogenetic tree representation of DprA (left) and ComM  
22 (right) homologues from all naturally competent and gene transfer agent containing bacterial  
23 genomes. Shown in the dashed box are all DprA homologues which lack a DprA domain 3; all  
24 genomes in which the DprA protein encodes a predicted DD3 also encode a ComM homologue.  
25 Multiple sequence alignment was done using the MUSCLE algorithm.

26  
27  
28

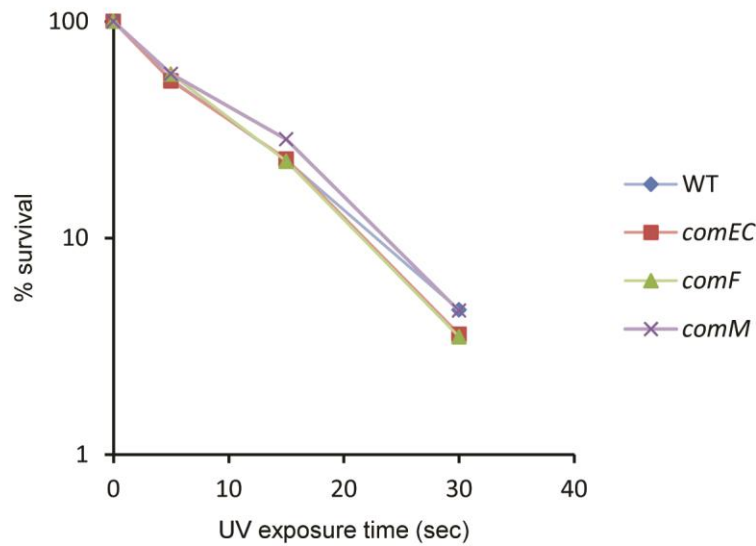

29

30 **Figure S2.** UV-sensitivity of WT,  $\Delta comEC$ ,  $\Delta comF$ , and  $\Delta comM$  strains expressed as %  
31 survival.

32

33

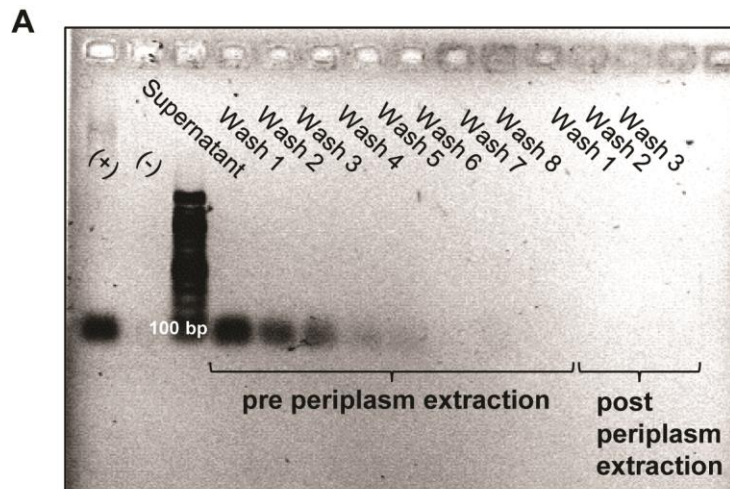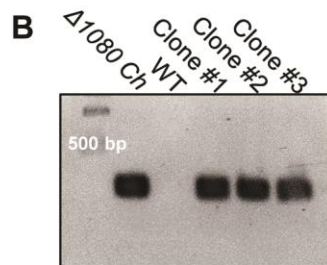

34

35 **Figure S3.** RcGTA-borne DNA tracking assay control experiments. **A**, Evaluation of residual  
 36 RcGTA-borne DNA release from cells after the consecutive wash steps described in the RcGTA  
 37 tracking assay. 2.5  $\mu$ l of each fraction were used as a PCR template with the Gm\_qPCR primers  
 38 to detect RcGTA-borne DNA. (+) indicates a positive control reaction where  $\Delta 1080$  mutant  
 39 chromosomal DNA was used as a PCR template, and (-) indicates a negative control where WT  
 40 B10 DNA was used as a PCR template. The PCR program used was: 95  $^{\circ}$ C 2:00 min, [95  $^{\circ}$ C 15  
 41 sec, 55  $^{\circ}$ C 15 sec, 72  $^{\circ}$ C 30 sec] $\times$ 30, 72  $^{\circ}$ C 7:00 min. **B**, PCR products obtained when using  
 42  $\Delta 1080$  mutant chromosome DNA, WT B10 chromosomal DNA, or three gentamycin-resistant  
 43 colonies obtained from the RcGTA tracking assay as a PCR template using the Gm\_for and  
 44 Gm\_rev primer set.

45

46

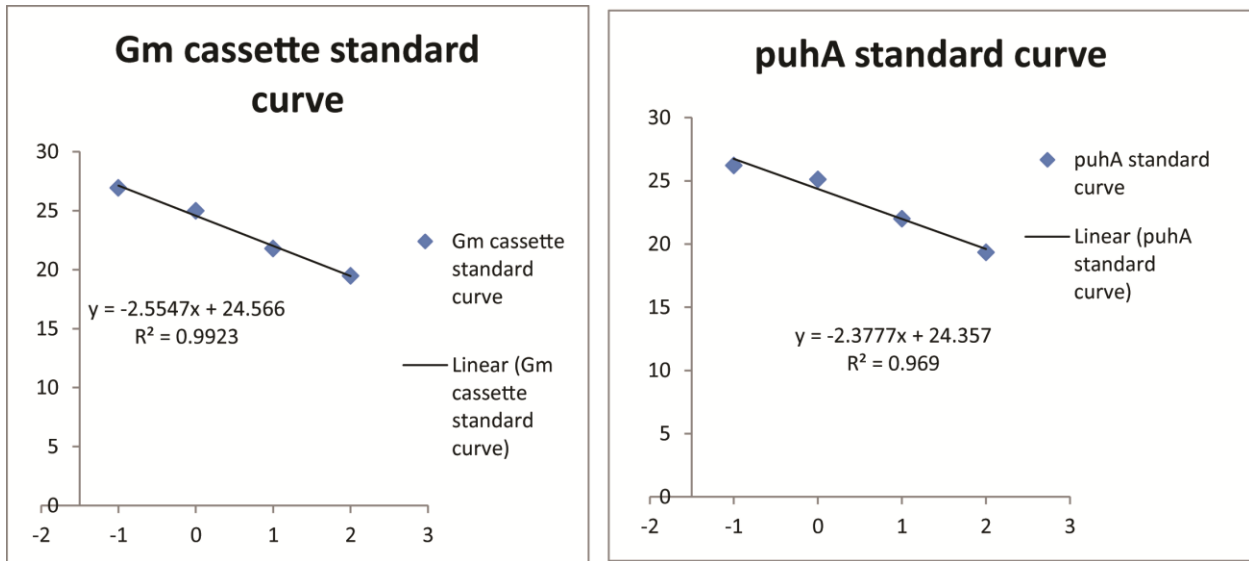

47

48 **Figure S4.** Calibration curves for Gm cassette and *puhA* qPCR primer sets with known  
 49 concentrations of DNA and associated Ct values. These standards were used to calculate the  
 50 concentration of DNA obtained from the RcGTA tracking assay.

51

52

53

54

55

56

57

58

59 **Table S1.** Presence of ComEC and ComF homologues in other bacterial species that contain  
60 function or putative GTAs, or are naturally competent.

| <b>Species</b>                     | <b>ComEC</b> | <b>ComF</b> | <b>Verified funtional gene transfer agent</b> | <b>Putative gene transfer agent</b> | <b>Naturally competent</b> |
|------------------------------------|--------------|-------------|-----------------------------------------------|-------------------------------------|----------------------------|
| <i>Rhodobacter capsulatus</i>      | yes          | yes         | yes                                           | N/A                                 | no                         |
| <i>Synechocystics PC 6803</i>      | yes          | yes         | no                                            | no                                  | yes                        |
| <i>Helicobacter pylori</i>         | yes          | yes         | no                                            | no                                  | yes                        |
| <i>Rhizobium elti</i>              | yes          | yes         | no                                            | yes                                 | no                         |
| <i>Bartonella grahamii</i>         | yes          | yes         | yes                                           | N/A                                 | no                         |
| <i>Brucella abortus</i>            | yes          | yes         | no                                            | yes                                 | no                         |
| <i>Sphingomonas alaskensis</i>     | yes          | no          | no                                            | yes                                 | no                         |
| <i>Caulobacter crescentus</i>      | yes          | yes         | no                                            | yes                                 | no                         |
| <i>Rhodopseudomonas palustris</i>  | yes          | yes         | no                                            | yes                                 | no                         |
| <i>Nitrobacter hamburgensis</i>    | yes          | yes         | no                                            | yes                                 | no                         |
| <i>Rickettsia felis</i>            | yes          | yes         | no                                            | yes                                 | no                         |
| <i>Ruegeria mobilis</i>            | yes          | yes         | yes                                           | N/A                                 | no                         |
| <i>Paracoccus denitrificans</i>    | yes          | yes         | no                                            | yes                                 | no                         |
| <i>Rhodobacter sphaeroides</i>     | yes          | yes         | no                                            | yes                                 | no                         |
| <i>Ruegeria pomeroyi</i>           | yes          | yes         | yes                                           | N/A                                 | no                         |
| <i>Roseovarious nubinhibens</i>    | yes          | yes         | yes                                           | N/A                                 | no                         |
| <i>Wolbachia pipientis</i>         | yes          | yes         | no                                            | yes                                 | no                         |
| <i>Haemophils influenzae</i>       | yes          | yes         | no                                            | no                                  | yes                        |
| <i>Vibrio cholerae</i>             | yes          | yes         | no                                            | no                                  | yes                        |
| <i>Desulfovibria desulfuricans</i> | yes          | yes         | yes                                           | N/A                                 | no                         |
| <i>Streptococcus pneumoniae</i>    | yes          | yes         | no                                            | no                                  | yes                        |
| <i>Bacillis subtilis</i>           | yes          | yes         | no                                            | no                                  | yes                        |
| <i>Neisseria meningitidis</i>      | yes          | yes         | no                                            | no                                  | yes                        |

61 **Table S2.** One way ANOVA results comparing relative RcGTA-borne periplasmic DNA of WT,  
62 *ΔcomEC*, and *ΔcomF* strains.

63

| <b>Strain 1</b> | <b>Strain 2</b> | <b>p-value</b> |
|-----------------|-----------------|----------------|
| WT              | <i>ΔcomEC</i>   | 0.02029        |
| WT              | <i>ΔcomF</i>    | 0.0000181      |
| <i>ΔcomEC</i>   | <i>ΔcomF</i>    | 0.4518         |

64

65

66

67

68

69

70

71

72

73

74

75

76

77

78 **Table S3.** Raw data for RcGTA tracking assay qPCR analysis

| log10(DNA conc.) | GmR cassette target | Ct    | Calculated DNA conc. (ng) | log10(DNA conc.) | <i>puhA</i> target | Ct    | Calculated DNA conc. (ng) |                                    |
|------------------|---------------------|-------|---------------------------|------------------|--------------------|-------|---------------------------|------------------------------------|
|                  | 0 ng                | 37.02 |                           |                  | 0 ng               | 36.93 |                           |                                    |
| -1               | 0.1 ng              | 26.92 |                           | -1               | 0.1 ng             | 26.22 |                           |                                    |
| 0                | 1 ng                | 24.97 |                           | 0                | 1 ng               | 25.11 |                           |                                    |
| 1                | 10 ng               | 21.79 |                           | 1                | 10 ng              | 22.00 |                           |                                    |
| 2                | 100 ng              | 19.46 |                           | 2                | 100 ng             | 19.33 |                           |                                    |
|                  |                     |       |                           |                  |                    |       |                           | <b>Ratio Gm/<i>puhA</i> (x100)</b> |
|                  | No GTA1             | 27.66 | 0.0612                    |                  | No GTA1            | 15.81 | 2756.25                   | 0.002223                           |
|                  | WT1                 | 20.10 | 55.75                     |                  | WT1                | 14.57 | 9224.23                   | 0.604468                           |
|                  | <i>ΔcomEC1</i>      | 18.42 | 252.99                    |                  | <i>ΔcomEC1</i>     | 15.12 | 5407.12                   | 4.678850                           |
|                  | <i>ΔcomF1</i>       | 18.07 | 347.78                    |                  | <i>ΔcomF1</i>      | 14.34 | 11547.12                  | 3.011910                           |
|                  |                     |       |                           |                  |                    |       |                           |                                    |
|                  | No GTA2             | 29.72 | 0.0095                    |                  | No GTA2            | 16.15 | 1997.92                   | 0.000478                           |
|                  | WT2                 | 20.69 | 32.85                     |                  | WT2                | 15.33 | 4391.08                   | 0.74828                            |
|                  | <i>ΔcomEC2</i>      | 16.98 | 925.67                    |                  | <i>ΔcomEC2</i>     | 14.09 | 14676.18                  | 6.30735                            |
|                  | <i>ΔcomF2</i>       | 18.00 | 371.01                    |                  | <i>ΔcomF2</i>      | 14.83 | 7138.49                   | 5.19734                            |
|                  |                     |       |                           |                  |                    |       |                           |                                    |
|                  | No GTA3             | 30.26 | 0.0058                    |                  | No GTA3            | 17.13 | 771.90                    | 0.000763                           |
|                  | WT3                 | 23.62 | 2.34                      |                  | WT3                | 17.99 | 335.43                    | 0.698033                           |
|                  | <i>ΔcomEC3</i>      | 20.55 | 37.02                     |                  | <i>ΔcomEC3</i>     | 16.60 | 1290.64                   | 2.868773                           |
|                  | <i>ΔcomF3</i>       | 21.63 | 14.02                     |                  | <i>ΔcomF3</i>      | 17.79 | 408.17                    | 3.436477                           |

79

80
